# Supplementary material
Source: Springer Nature journal article supplement (https://www.springermedizin.de/resource/supplementary/12963_2013_238_MOESM7_ESM.docx/9572426)
Supplement: MOESM7 [file 9572426]

*Figure 12. Ratio of undetermined intent poisonings to all suicide poisonings, by educational levels, 1997- 2010.*
